# Supplementary material for: Genomics of sablefish (Anoplopoma fimbria): expressed genes, mitochondrial phylogeny, linkage map and identification of a putative sex gene
Source: PubMed Central journal article supplement (PMC3708741; doi:10.1186/1471-2164-14-452), 2013-07-06

**A. fibribria LG01-m**

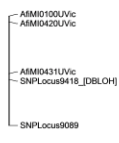

**A. fibribria LG01**

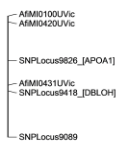

**A. fibribria LG01-f**

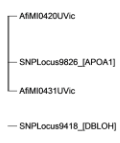

**A. fibribria LG02-m**

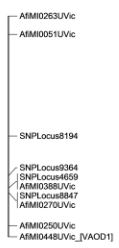

**A. fibribria LG02**

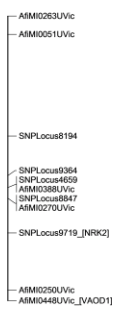

**A. fibribria LG02-f**

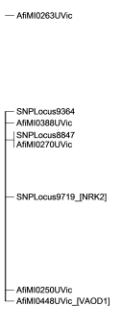

**A. fibribria LG03-m**

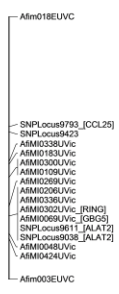

**A. fibribria LG03**

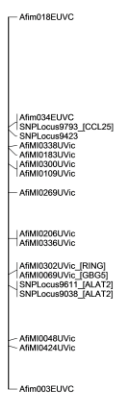

**A. fibribria LG03-f**

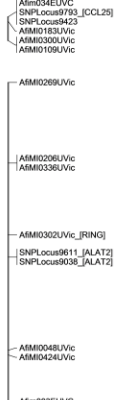

**A. fibribria LG04-m**

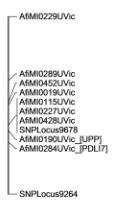

**A. fibribria LG04**

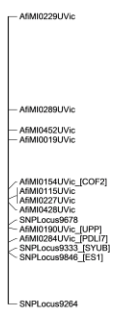

**A. fibribria LG04-f**

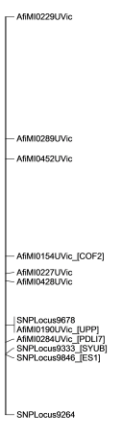

**A. fibribria LG05-m**

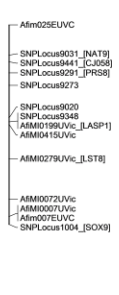

**A. fibribria LG05**

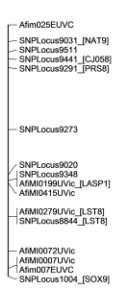

**A. fibribria LG05-f**

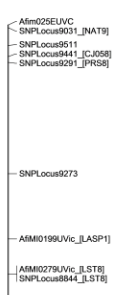

**A. fibribria LG06-m**

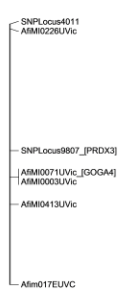

**A. fibribria LG06**

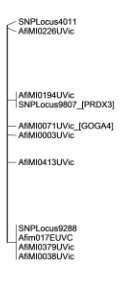

**A. fibribria LG06-f**

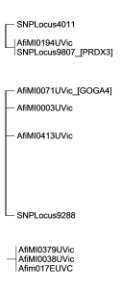

**A. fibribria LG07-m**

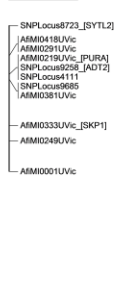

**A. fibribria LG07**

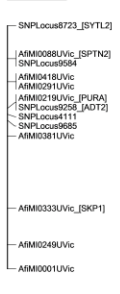

**A. fibribria LG07-f**

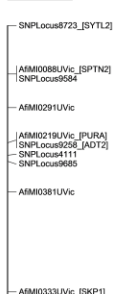

**A. fibribria LG08-m**

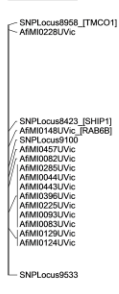

**A. fibribria LG08**

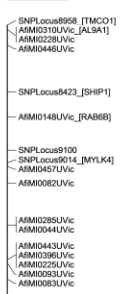

**A. fibribria LG08-f**

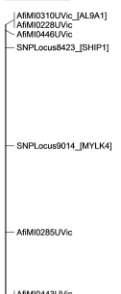



A. fibribria LG17-m

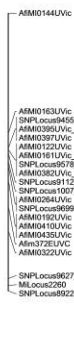

A. fibribria LG17

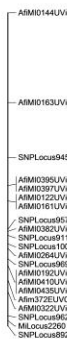

A. fibribria LG17-f

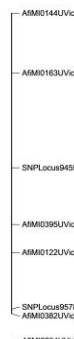

A. fibribria LG18-m

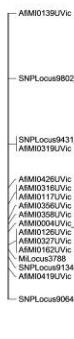

A. fibribria LG18

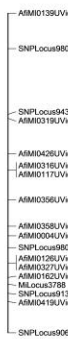

A. fibribria LG18-f

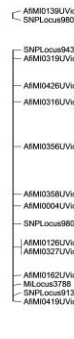

A. fibribria LG19-m

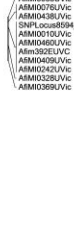

A. fibribria LG19

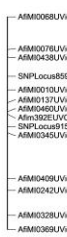

A. fibribria LG19-f

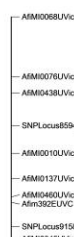

A. fibribria LG20-m

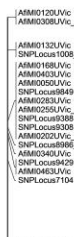

A. fibribria LG20

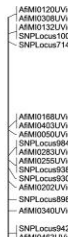

A. fibribria LG20-f

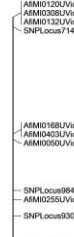

A. fibribria LG21-m

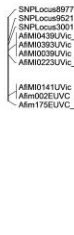

A. fibribria LG21

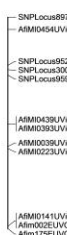

A. fibribria LG21-f

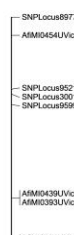

A. fibribria LG22-m

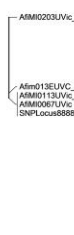

A. fibribria LG22

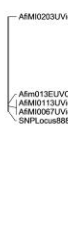

A. fibribria LG22-f

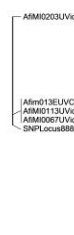

A. fibribria LG23-m

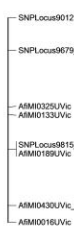

A. fibribria LG23

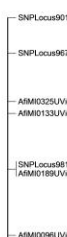

A. fibribria LG23-f

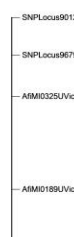

A. fibribria LG24-m

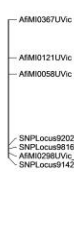

A. fibribria LG24

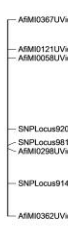

A. fibribria LG24-f

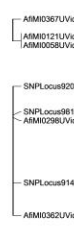

Supplement: 1471-2164-14-452-S5.pdf [file 1471-2164-14-452-S5.pdf]
