# Supplementary material for: Genomics of sablefish (Anoplopoma fimbria): expressed genes, mitochondrial phylogeny, linkage map and identification of a putative sex gene
Source: PubMed Central journal article supplement (PMC3708741; doi:10.1186/1471-2164-14-452), 2013-07-06

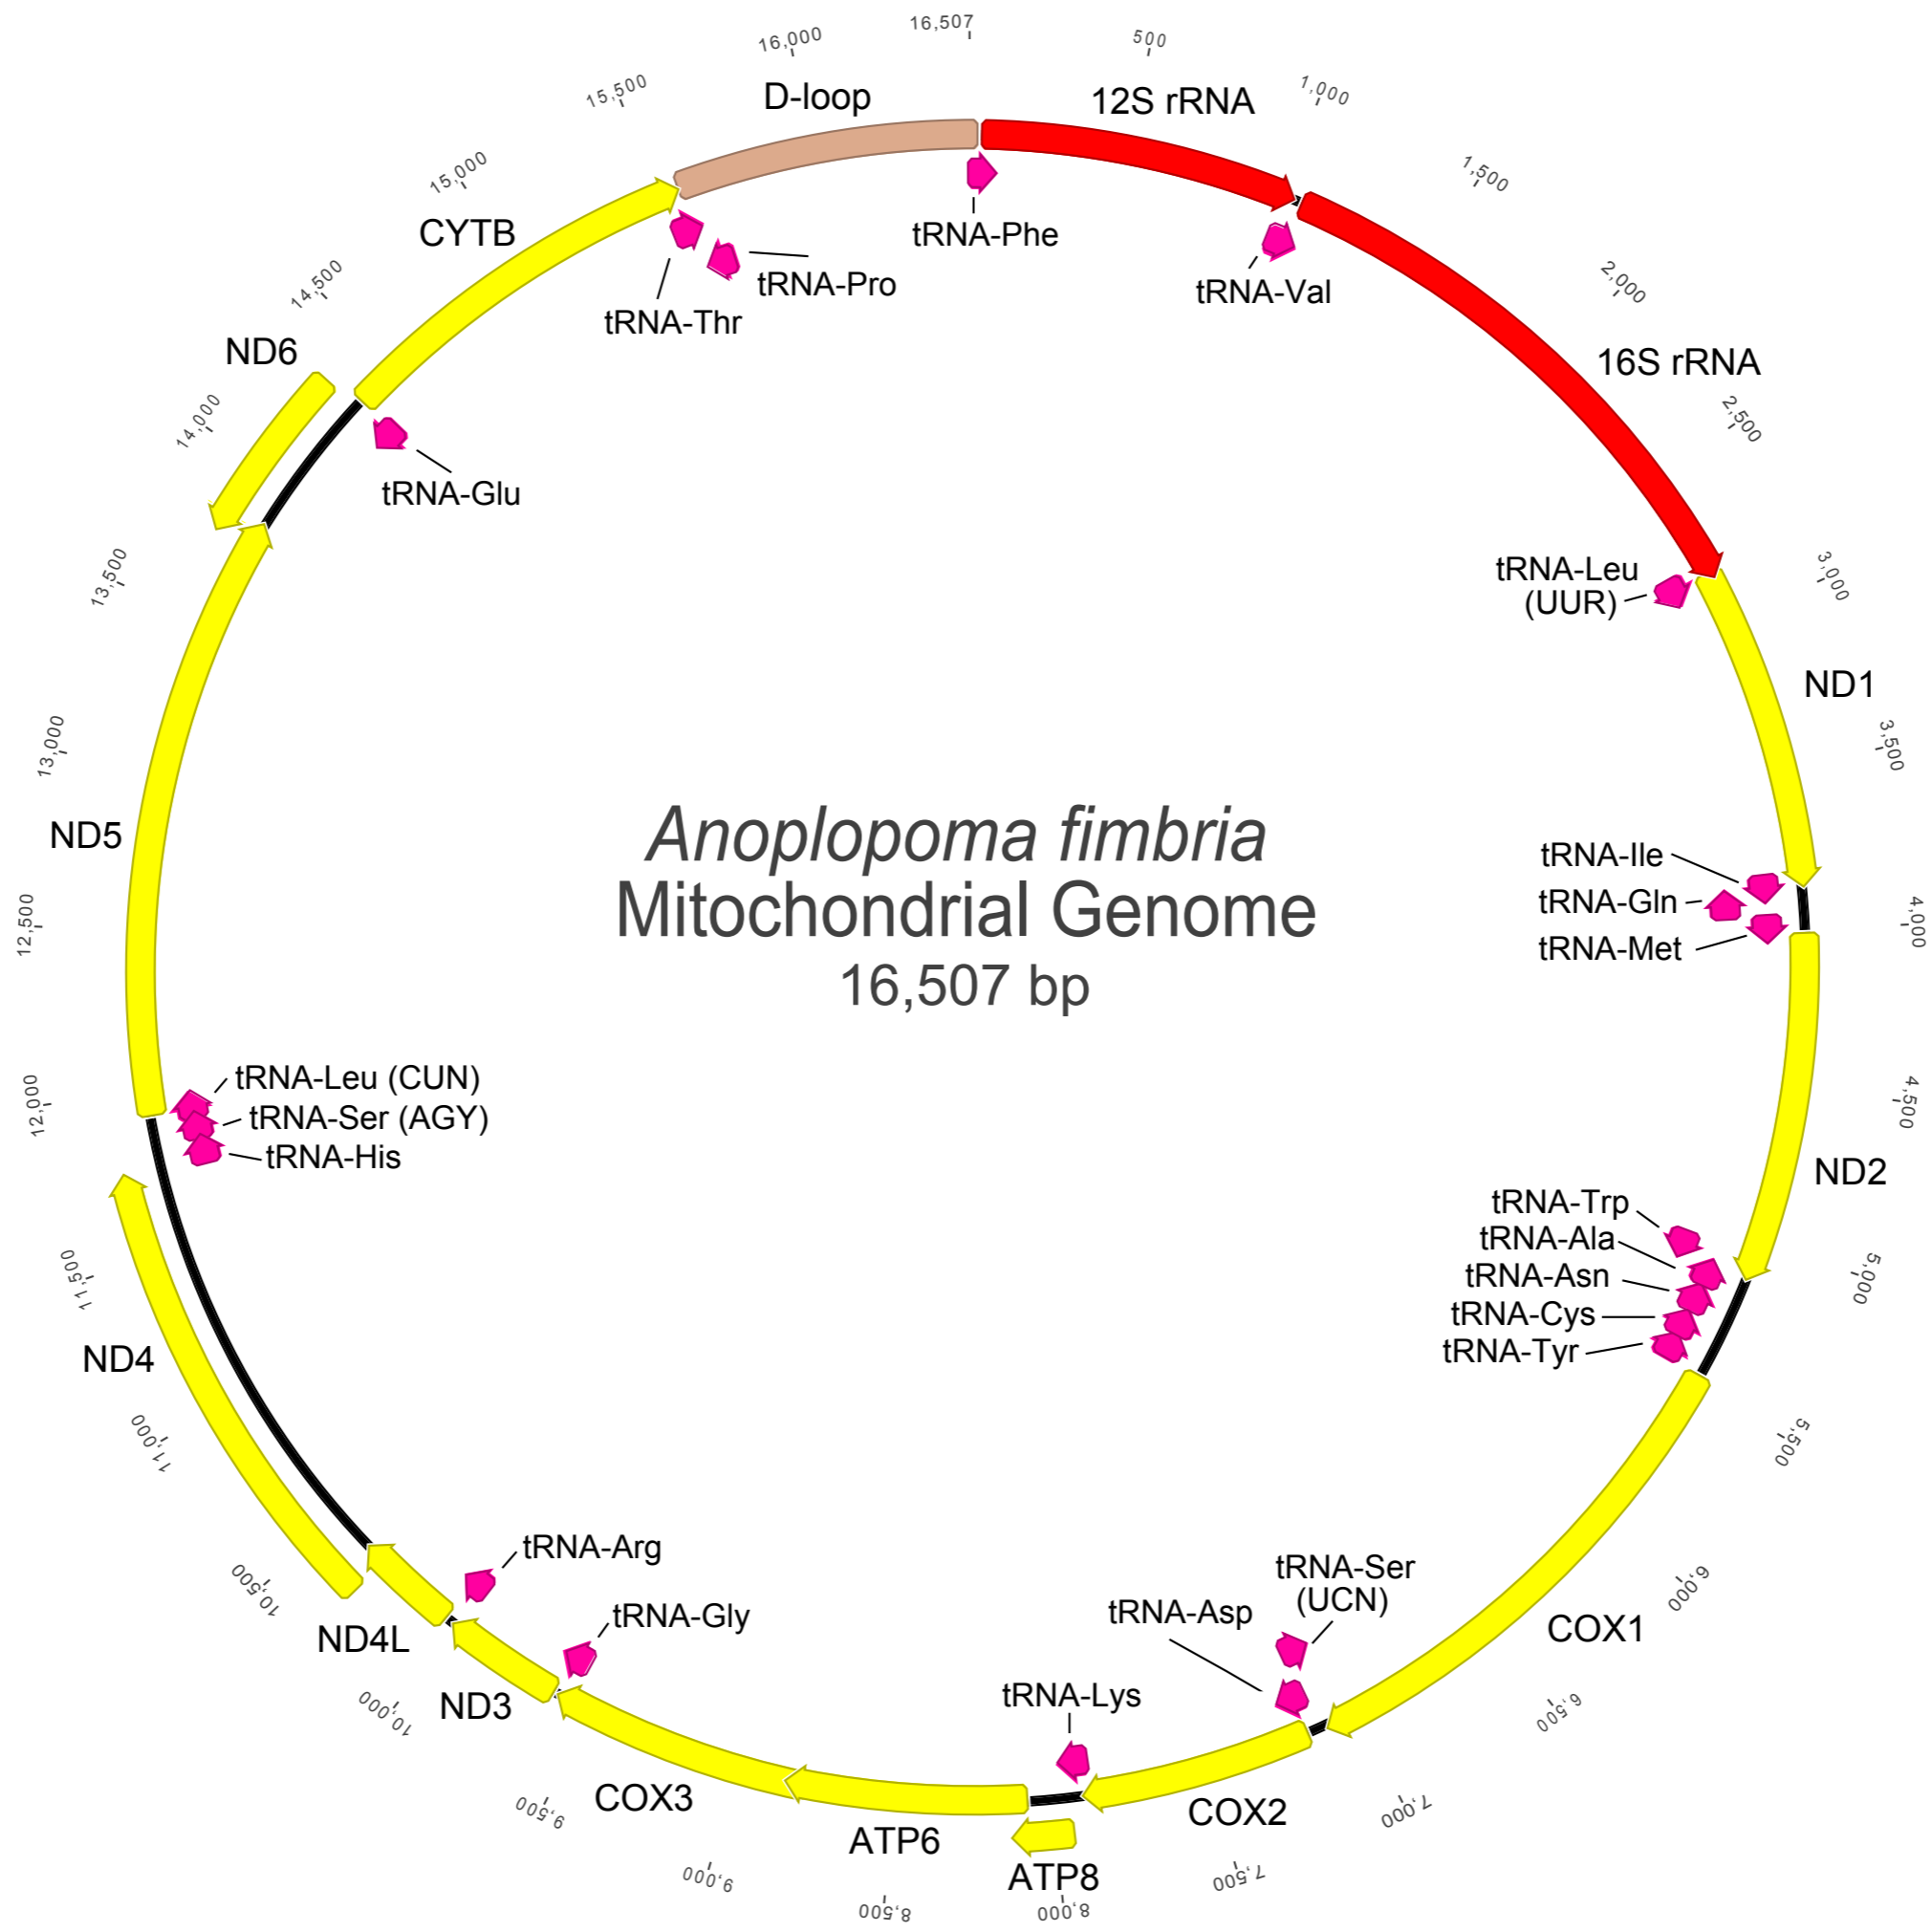

Supplement: 1471-2164-14-452-S1.pdf [file 1471-2164-14-452-S1.pdf]
